# Supplementary material
Source: publisher figshare collection journal article supplement (https://acs.figshare.com/ndownloader/files/4764268)
Supplement: Supplementary file 1 [file 4764268]

## Supporting Information

### Polymer-Mediated Self-Assembly of $\text{TiO}_2@\text{Cu}_2\text{O}$ Core-Shell Nanowire Array for Highly Efficient Photoelectrochemical Water Oxidation

Weiyong Yuan,<sup>\*,†,‡</sup> Jia Yuan,<sup>†,‡</sup> Jiale Xie,<sup>†,‡</sup> and Chang Ming Li<sup>†,‡</sup>

<sup>†</sup>Institute for Clean energy & Advanced Materials, Faculty of Materials & Energy,  
Southwest University, Chongqing 400715, China.

<sup>‡</sup>Chongqing Key Laboratory for Advanced Materials and Technologies of Clean Energies,  
Chongqing 400715, China.

<sup>\*</sup>Corresponding author. E-mail address: yuanweiyong@swu.edu.cn

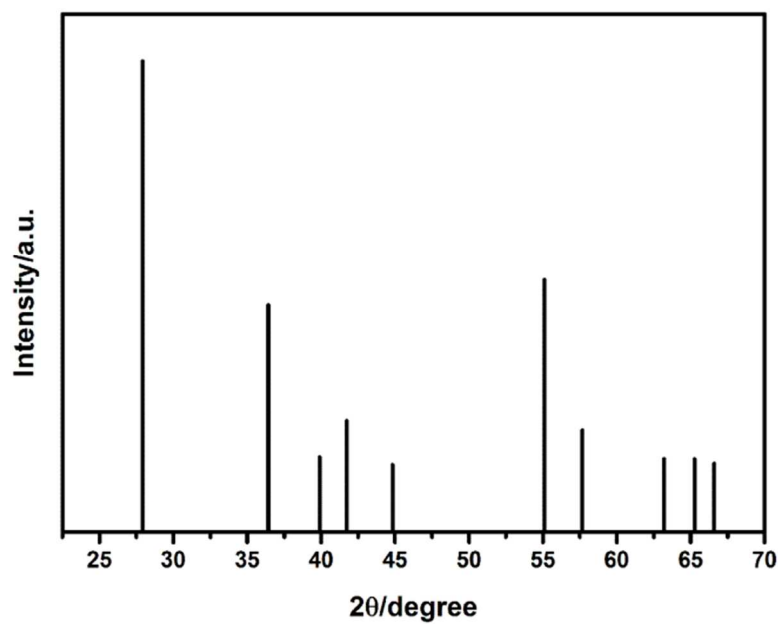

Figure S1. The standard powder diffraction pattern of tetragonal rutile  $\text{TiO}_2$  (JCPDS No. 88-1175).

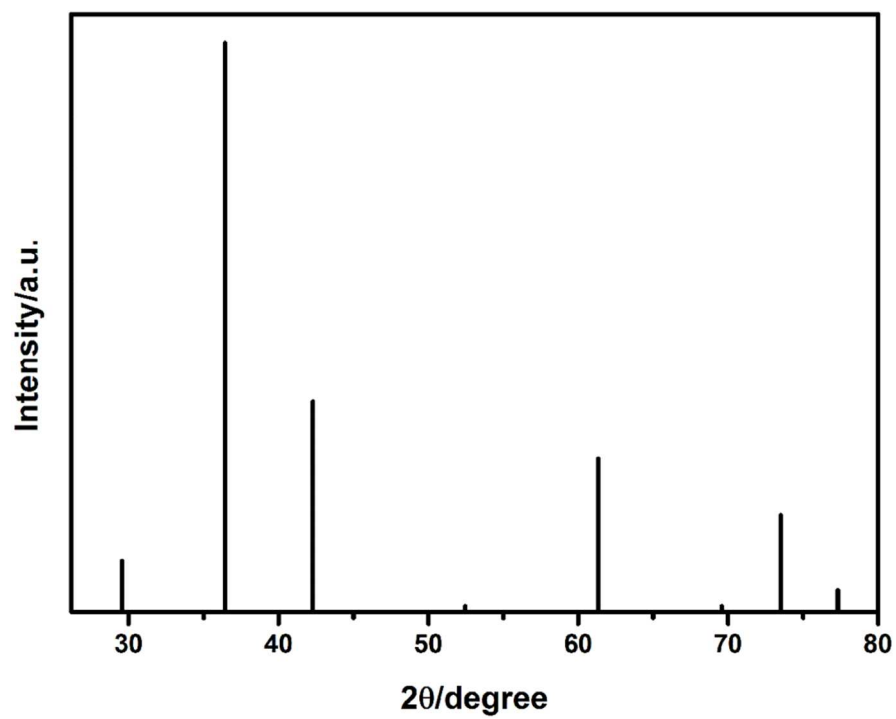

Figure S2. The standard powder diffraction pattern of cubic Cu<sub>2</sub>O (JCPDS #05-0667).
